# Supplementary material for: A Pan-Cancer Analysis of the Oncogenic Role of Transcription Factor 3 in Human Tumors
Source: Research Square preprint supplement (doi:10.21203/rs.3.rs-4386631/v1), 2024-05-28
Supplement: Supplementary file 1 [file 114b29724c7b754e2a9c34c7.xlsx]

## Sheet: genecorr_table
cancer	infiltrates	rho	p	adj.p
MESO (n=87)	MEX3D	0.894456	1.87158e-31	3.77462e-31
GBM (n=153)	ILF3	0.873842	3.79965e-49	1.08562e-48
LIHC (n=371)	ILF3	0.866304	2.78559e-113	1.33708e-111
GBM (n=153)	PTBP1	0.865908	2.78245e-47	7.50324e-47
LIHC (n=371)	PTBP1	0.85502	2.86811e-107	8.60432e-106
ACC (n=79)	LMNB2	0.834591	1.24231e-21	1.93607e-21
SARC (n=260)	MEX3D	0.827406	1.34937e-66	6.89039e-66
LIHC (n=371)	DAZAP1	0.826594	3.80814e-94	5.7122e-93
GBM (n=153)	LMNB2	0.82538	2.53565e-39	5.90831e-39
GBM (n=153)	MEX3D	0.818641	3.37192e-38	7.70724e-38
READ (n=166)	CSNK1G2	0.815055	1.01829e-40	2.41969e-40
HNSC-HPV- (n=422)	CSNK1G2	0.814249	3.02534e-101	7.26081e-100
ACC (n=79)	MEX3D	0.811483	1.20379e-19	1.79446e-19
LIHC (n=371)	LMNB2	0.810941	6.67086e-88	7.62383e-87
LIHC (n=371)	CSNK1G2	0.809921	1.62466e-87	1.77235e-86
THYM (n=120)	PTBP1	0.809917	4.11369e-29	7.71317e-29
HNSC (n=522)	CSNK1G2	0.805443	3.17139e-120	1.90283e-118
LUSC (n=501)	LMNB2	0.79596	7.45033e-111	2.98013e-109
THYM (n=120)	DAZAP1	0.786013	2.0965e-26	3.78316e-26
LUAD (n=515)	CSNK1G2	0.773938	7.40444e-104	1.97452e-102
SARC (n=260)	CSNK1G2	0.771926	1.11768e-52	3.35303e-52
HNSC-HPV- (n=422)	MEX3D	0.769778	6.55961e-84	5.62252e-83
STAD (n=415)	CSNK1G2	0.7683	4.84246e-82	4.00755e-81
KIRP (n=290)	LMNB2	0.76704	1.89704e-57	6.5984e-57
KIRP (n=290)	ILF3	0.76236	2.28392e-56	7.7203e-56
ACC (n=79)	ILF3	0.759323	5.05741e-16	7.22487e-16
LUAD (n=515)	MEX3D	0.758158	2.50835e-97	4.66617e-96
ACC (n=79)	DAZAP1	0.757498	6.51518e-16	9.19791e-16
HNSC (n=522)	MEX3D	0.75683	4.2703e-98	9.31702e-97
LUSC (n=501)	CSNK1G2	0.755582	9.90617e-94	1.39852e-92
KIRP (n=290)	PTBP1	0.753791	1.8791e-54	5.934e-54
HNSC-HPV- (n=422)	PTBP1	0.753752	1.36076e-78	9.60537e-78
MESO (n=87)	LMNB2	0.753281	3.86897e-17	5.62759e-17
ESCA (n=185)	LMNB2	0.751482	6.90648e-35	1.50687e-34
LGG (n=516)	ILF3	0.750186	2.13997e-94	3.42395e-93
ACC (n=79)	PTBP1	0.748369	2.23739e-15	3.10389e-15
STAD (n=415)	LMNB2	0.745716	7.69436e-75	4.73499e-74
UCEC (n=545)	MEX3D	0.742884	1.04026e-96	1.7833e-95
LUSC (n=501)	PTBP1	0.74218	9.07319e-89	1.20976e-87
HNSC-HPV- (n=422)	ILF3	0.741883	6.51966e-75	4.11768e-74
LUSC (n=501)	DAZAP1	0.740731	2.98944e-88	3.58732e-87
ESCA (n=185)	CSNK1G2	0.736678	6.4534e-33	1.3468e-32
KIRP (n=290)	MEX3D	0.735316	1.40406e-50	4.05993e-50
STAD (n=415)	PTBP1	0.734447	1.58835e-71	8.86523e-71
BRCA-LumA (n=568)	MEX3D	0.734379	2.52751e-97	4.66617e-96
HNSC (n=522)	PTBP1	0.731135	2.10894e-88	2.66393e-87
LIHC (n=371)	MEX3D	0.730936	3.34633e-63	1.54446e-62
MESO (n=87)	ILF3	0.729314	1.14336e-15	1.59539e-15
GBM (n=153)	CSNK1G2	0.727055	1.94073e-26	3.5286e-26
ESCA (n=185)	PTBP1	0.726508	1.22518e-31	2.51319e-31
LUAD (n=515)	LMNB2	0.72465	5.37236e-85	4.9591e-84
READ (n=166)	LMNB2	0.723871	3.13602e-28	5.83447e-28
HNSC (n=522)	ILF3	0.723634	8.81682e-86	8.46415e-85
PCPG (n=181)	MEX3D	0.72321	1.37453e-30	2.682e-30
MESO (n=87)	CSNK1G2	0.721696	3.11431e-15	4.27106e-15
HNSC-HPV- (n=422)	LMNB2	0.721642	4.4225e-69	2.35867e-68
KIRP (n=290)	CSNK1G2	0.715272	9.95071e-47	2.65352e-46
HNSC-HPV+ (n=98)	CSNK1G2	0.715127	1.32014e-16	1.90863e-16
OV (n=303)	MEX3D	0.712671	2.89763e-48	8.0864e-48
THYM (n=120)	LMNB2	0.711723	8.1409e-20	1.22114e-19
HNSC (n=522)	LMNB2	0.70809	1.28973e-80	1.03179e-79
LUAD (n=515)	DAZAP1	0.707465	2.33887e-79	1.75415e-78
LUAD (n=515)	PTBP1	0.706207	5.82823e-79	4.23871e-78
BRCA-Basal (n=191)	MEX3D	0.704464	5.89828e-30	1.13247e-29
LUSC (n=501)	ILF3	0.702534	9.68306e-76	6.28091e-75
BRCA-Basal (n=191)	DAZAP1	0.701865	1.17219e-29	2.23273e-29
KIRC (n=533)	CSNK1G2	0.699502	1.62511e-79	1.25815e-78
SARC (n=260)	PTBP1	0.697642	3.07447e-39	7.09492e-39
BRCA-LumA (n=568)	DAZAP1	0.697578	5.4485e-84	4.84311e-83
LGG (n=516)	LMNB2	0.697292	2.35827e-76	1.57218e-75
KICH (n=66)	ILF3	0.697067	7.95467e-11	9.9954e-11
STAD (n=415)	DAZAP1	0.696463	1.68806e-61	7.64406e-61
STAD (n=415)	MEX3D	0.696329	1.81938e-61	8.08614e-61
ESCA (n=185)	DAZAP1	0.694583	5.66068e-28	1.04505e-27
BRCA (n=1100)	MEX3D	0.691851	1.74419e-157	4.18606e-155
PRAD (n=498)	ILF3	0.689953	1.262e-71	7.21142e-71
ACC (n=79)	CSNK1G2	0.689679	2.07959e-12	2.7125e-12
BLCA (n=408)	CSNK1G2	0.689307	8.43238e-59	3.21233e-58
BRCA-Her2 (n=82)	PTBP1	0.68888	8.43863e-13	1.11893e-12
KIRP (n=290)	DAZAP1	0.68872	4.11446e-42	1.02861e-41
SKCM-Metastasis (n=368)	MEX3D	0.687572	8.11774e-53	2.49776e-52
PRAD (n=498)	MEX3D	0.685735	1.9494e-70	1.06331e-69
THCA (n=509)	CSNK1G2	0.684935	9.90329e-72	5.79705e-71
BLCA (n=408)	MEX3D	0.684672	9.8195e-58	3.51743e-57
PAAD (n=179)	CSNK1G2	0.684295	4.61129e-26	8.19785e-26
MESO (n=87)	PTBP1	0.683094	3.12673e-13	4.19226e-13
PAAD (n=179)	DAZAP1	0.681041	9.67398e-26	1.70717e-25
BRCA-LumB (n=219)	MEX3D	0.680881	3.52743e-31	6.99656e-31
BRCA (n=1100)	DAZAP1	0.678639	2.45482e-149	2.94579e-147
GBM (n=153)	DAZAP1	0.67827	5.88506e-22	9.39121e-22
KIRC (n=533)	DAZAP1	0.676368	1.57345e-72	9.44072e-72
BRCA-LumA (n=568)	CSNK1G2	0.67613	4.05892e-77	2.78326e-76
SKCM (n=471)	MEX3D	0.675888	3.78947e-64	1.81894e-63
OV (n=303)	CSNK1G2	0.675235	1.11088e-41	2.74858e-41
HNSC-HPV+ (n=98)	MEX3D	0.673329	3.05816e-14	4.12336e-14
STAD (n=415)	ILF3	0.672584	5.78674e-56	1.92891e-55
PAAD (n=179)	PTBP1	0.670006	1.11341e-24	1.89517e-24
OV (n=303)	LMNB2	0.669538	9.18818e-41	2.20516e-40
COAD (n=458)	CSNK1G2	0.669068	9.33519e-61	3.86284e-60
LUSC (n=501)	MEX3D	0.666958	9.1445e-66	4.47894e-65
KICH (n=66)	CSNK1G2	0.66492	1.13702e-09	1.39002e-09
BRCA-Basal (n=191)	CSNK1G2	0.664022	1.1857e-25	2.07714e-25
SKCM-Metastasis (n=368)	CSNK1G2	0.662899	6.24329e-48	1.72229e-47
CHOL (n=36)	ILF3	0.662548	1.07213e-05	1.1968e-05
COAD (n=458)	LMNB2	0.659068	2.13479e-58	7.88231e-58
HNSC-HPV- (n=422)	DAZAP1	0.657681	1.24848e-53	3.89135e-53
BRCA-Basal (n=191)	PTBP1	0.656393	6.48367e-25	1.11149e-24
SKCM (n=471)	CSNK1G2	0.655923	2.87497e-59	1.13113e-58
READ (n=166)	MEX3D	0.654678	1.10486e-21	1.73311e-21
ESCA (n=185)	MEX3D	0.651584	9.83712e-24	1.62821e-23
PRAD (n=498)	PTBP1	0.650785	2.59236e-61	1.13121e-60
KICH (n=66)	LMNB2	0.649473	3.64857e-09	4.37829e-09
UCEC (n=545)	CSNK1G2	0.648366	2.60038e-66	1.30019e-65
PCPG (n=181)	CSNK1G2	0.647168	7.34544e-23	1.19926e-22
PAAD (n=179)	LMNB2	0.645178	1.884e-22	3.03463e-22
THCA (n=509)	LMNB2	0.643906	6.10574e-61	2.57084e-60
BRCA (n=1100)	CSNK1G2	0.642794	3.02374e-129	2.419e-127
KIRC (n=533)	MEX3D	0.642667	1.99258e-63	9.37685e-63
THCA (n=509)	ILF3	0.641623	2.17611e-60	8.85198e-60
BRCA-LumA (n=568)	LMNB2	0.641611	3.3179e-67	1.73108e-66
MESO (n=87)	DAZAP1	0.641594	2.14562e-11	2.73908e-11
SARC (n=260)	LMNB2	0.64132	1.59725e-31	3.24864e-31
LGG (n=516)	PTBP1	0.640803	5.34947e-61	2.29263e-60
ESCA (n=185)	ILF3	0.640326	9.82111e-23	1.59261e-22
CHOL (n=36)	PTBP1	0.635521	3.11973e-05	3.45039e-05
HNSC (n=522)	DAZAP1	0.634382	3.97437e-60	1.58975e-59
PCPG (n=181)	LMNB2	0.63438	9.02346e-22	1.42476e-21
LUAD (n=515)	ILF3	0.633447	4.03912e-59	1.56353e-58
CESC (n=306)	PTBP1	0.632124	1.52157e-35	3.35025e-35
BLCA (n=408)	PTBP1	0.628752	2.79016e-46	7.35867e-46
KICH (n=66)	PTBP1	0.625676	1.94142e-08	2.29528e-08
PRAD (n=498)	CSNK1G2	0.624813	2.8155e-55	9.25644e-55
CHOL (n=36)	DAZAP1	0.624453	4.69437e-05	5.12113e-05
BRCA-Her2 (n=82)	LMNB2	0.623752	3.85305e-10	4.79136e-10
BRCA-Basal (n=191)	LMNB2	0.623391	5.90864e-22	9.39121e-22
CESC (n=306)	MEX3D	0.623273	2.50558e-34	5.41746e-34
PAAD (n=179)	MEX3D	0.622685	1.32841e-20	2.04371e-20
CESC (n=306)	ILF3	0.619691	7.58989e-34	1.61201e-33
BRCA-Her2 (n=82)	DAZAP1	0.618202	6.08673e-10	7.52998e-10
UCEC (n=545)	LMNB2	0.617988	1.02967e-58	3.86125e-58
KIRC (n=533)	ILF3	0.617487	2.43787e-57	8.35843e-57
LGG (n=516)	MEX3D	0.615861	3.37887e-55	1.09585e-54
UCEC (n=545)	PTBP1	0.615753	3.46025e-58	1.25827e-57
BLCA (n=408)	ILF3	0.615123	7.81147e-44	2.01586e-43
BRCA-Her2 (n=82)	ILF3	0.612325	9.78259e-10	1.20401e-09
PCPG (n=181)	DAZAP1	0.61207	5.47641e-20	8.26628e-20
CESC (n=306)	CSNK1G2	0.611612	8.77532e-33	1.81558e-32
PRAD (n=498)	LMNB2	0.611323	2.32034e-52	6.87507e-52
SKCM-Primary (n=103)	MEX3D	0.610827	7.31391e-12	9.48832e-12
CHOL (n=36)	CSNK1G2	0.608494	8.23787e-05	8.9461e-05
SKCM-Primary (n=103)	DAZAP1	0.608191	9.50742e-12	1.22676e-11
SKCM (n=471)	DAZAP1	0.608084	5.80412e-49	1.63881e-48
THCA (n=509)	PTBP1	0.607724	1.03307e-52	3.13843e-52
BRCA (n=1100)	LMNB2	0.604311	1.78038e-110	6.10418e-109
BRCA-LumA (n=568)	PTBP1	0.603295	1.34495e-57	4.74689e-57
HNSC-HPV+ (n=98)	ILF3	0.602994	5.02237e-11	6.34404e-11
BLCA (n=408)	DAZAP1	0.602099	1.32483e-41	3.24447e-41
SKCM-Primary (n=103)	CSNK1G2	0.600789	1.96076e-11	2.51648e-11
THCA (n=509)	MEX3D	0.600788	2.96965e-51	8.69167e-51
SKCM-Primary (n=103)	ILF3	0.598658	2.4067e-11	3.05612e-11
TGCT (n=150)	MEX3D	0.597107	7.34038e-16	1.03023e-15
BRCA-Her2 (n=82)	CSNK1G2	0.595999	3.47732e-09	4.19376e-09
BRCA-LumA (n=568)	ILF3	0.592114	4.92873e-55	1.57719e-54
SKCM-Metastasis (n=368)	DAZAP1	0.590791	5.33926e-36	1.1865e-35
UVM (n=80)	LMNB2	0.590038	8.43116e-09	1.00263e-08
KICH (n=66)	DAZAP1	0.585847	2.37173e-07	2.71055e-07
COAD (n=458)	MEX3D	0.585528	1.70376e-43	4.35003e-43
OV (n=303)	PTBP1	0.584463	3.76564e-29	7.11617e-29
HNSC-HPV+ (n=98)	LMNB2	0.582426	3.15426e-10	3.94283e-10
SARC (n=260)	ILF3	0.576411	2.02719e-24	3.40228e-24
SKCM (n=471)	LMNB2	0.574069	1.2229e-42	3.08943e-42
UVM (n=80)	DAZAP1	0.573629	2.66891e-08	3.1399e-08
KIRC (n=533)	PTBP1	0.571229	1.73008e-47	4.71839e-47
SKCM-Metastasis (n=368)	LMNB2	0.57105	3.11915e-33	6.56664e-33
SKCM (n=471)	ILF3	0.564525	5.39672e-41	1.3083e-40
BRCA-Her2 (n=82)	MEX3D	0.563827	3.47592e-08	4.06937e-08
UCS (n=57)	LMNB2	0.559178	6.14729e-06	6.89415e-06
BRCA-LumB (n=219)	CSNK1G2	0.555914	3.66867e-19	5.43506e-19
PCPG (n=181)	ILF3	0.555479	4.82168e-16	6.92935e-16
SKCM-Primary (n=103)	LMNB2	0.555353	1.14098e-09	1.39002e-09
KIRC (n=533)	LMNB2	0.554421	2.78358e-44	7.2615e-44
BRCA-LumB (n=219)	DAZAP1	0.554157	4.99666e-19	7.35704e-19
PCPG (n=181)	PTBP1	0.553974	5.9997e-16	8.52028e-16
READ (n=166)	PTBP1	0.553943	9.82585e-15	1.33232e-14
SKCM-Metastasis (n=368)	PTBP1	0.552837	7.69022e-31	1.51283e-30
SKCM-Metastasis (n=368)	ILF3	0.549804	1.86273e-30	3.60528e-30
BRCA (n=1100)	PTBP1	0.547399	5.2713e-87	5.50048e-86
BRCA (n=1100)	ILF3	0.547218	6.15702e-87	6.15702e-86
OV (n=303)	DAZAP1	0.546989	4.8222e-25	8.38643e-25
PRAD (n=498)	DAZAP1	0.545162	6.75293e-40	1.58892e-39
SKCM (n=471)	PTBP1	0.544594	9.98641e-38	2.26107e-37
HNSC-HPV+ (n=98)	PTBP1	0.541661	8.43878e-09	1.00263e-08
BRCA-LumB (n=219)	LMNB2	0.538592	7.13477e-18	1.04411e-17
BRCA-Basal (n=191)	ILF3	0.531653	2.50162e-15	3.45051e-15
SARC (n=260)	DAZAP1	0.5313	2.4234e-20	3.70456e-20
OV (n=303)	ILF3	0.527817	3.91311e-23	6.43251e-23
COAD (n=458)	ILF3	0.526701	4.73121e-34	1.01383e-33
CHOL (n=36)	MEX3D	0.526384	0.000974778	0.00104441
CHOL (n=36)	LMNB2	0.522265	0.00108584	0.00115823
READ (n=166)	DAZAP1	0.52163	5.75116e-13	7.66821e-13
THCA (n=509)	DAZAP1	0.518888	1.9866e-36	4.45593e-36
UVM (n=80)	CSNK1G2	0.517839	8.68673e-07	9.83404e-07
SKCM-Primary (n=103)	PTBP1	0.509478	3.88399e-08	4.52504e-08
COAD (n=458)	DAZAP1	0.506876	2.88627e-31	5.77253e-31
CESC (n=306)	DAZAP1	0.503648	4.36756e-21	6.76267e-21
PAAD (n=179)	ILF3	0.500002	1.0332e-12	1.36246e-12
BRCA-LumB (n=219)	PTBP1	0.498294	3.81e-15	5.19546e-15
CESC (n=306)	LMNB2	0.491574	5.06806e-20	7.69832e-20
BLCA (n=408)	LMNB2	0.476431	1.65136e-24	2.79103e-24
COAD (n=458)	PTBP1	0.473776	5.28092e-27	9.67496e-27
UCS (n=57)	MEX3D	0.461239	0.000305027	0.000329759
BRCA-LumB (n=219)	ILF3	0.455908	1.22329e-12	1.60432e-12
HNSC-HPV+ (n=98)	DAZAP1	0.450236	3.29444e-06	3.71205e-06
LGG (n=516)	DAZAP1	0.443897	2.51938e-26	4.51232e-26
UVM (n=80)	PTBP1	0.441704	4.10337e-05	4.51747e-05
UVM (n=80)	ILF3	0.44067	4.29774e-05	4.70986e-05
TGCT (n=150)	ILF3	0.428757	4.40041e-08	5.10192e-08
UCEC (n=545)	DAZAP1	0.422493	5.2576e-25	9.07787e-25
KICH (n=66)	MEX3D	0.42123	0.000428132	0.00046077
DLBC (n=48)	ILF3	0.416956	0.00319659	0.00336483
TGCT (n=150)	PTBP1	0.416337	1.16437e-07	1.33708e-07
UCEC (n=545)	ILF3	0.416294	2.95898e-24	4.93163e-24
TGCT (n=150)	CSNK1G2	0.405489	2.63951e-07	3.00228e-07
READ (n=166)	ILF3	0.401465	8.29076e-08	9.56626e-08
UCS (n=57)	CSNK1G2	0.39707	0.00222672	0.00235424
THYM (n=120)	ILF3	0.389576	1.0927e-05	1.21412e-05
UVM (n=80)	MEX3D	0.351172	0.00140355	0.0014905
DLBC (n=48)	MEX3D	0.346613	0.0158024	0.0164895
UCS (n=57)	DAZAP1	0.267954	0.0438828	0.0455926
LGG (n=516)	CSNK1G2	0.257249	3.039e-09	3.68364e-09
THYM (n=120)	CSNK1G2	0.253837	0.00514976	0.00539712
DLBC (n=48)	DAZAP1	0.247503	0.0898757	0.0929749
DLBC (n=48)	PTBP1	0.246526	0.091192	0.0939316
DLBC (n=48)	CSNK1G2	0.228289	0.118611	0.121652
DLBC (n=48)	LMNB2	0.203973	0.164351	0.166432
UCS (n=57)	ILF3	0.168395	0.210514	0.212283
TGCT (n=150)	DAZAP1	0.121897	0.137283	0.140204
TGCT (n=150)	LMNB2	0.116962	0.154043	0.156653
UCS (n=57)	PTBP1	0.105911	0.432977	0.434789
THYM (n=120)	MEX3D	0.0379262	0.680881	0.680881
