# Supplementary material for: A Pan-Cancer Analysis of the Oncogenic Role of Transcription Factor 3 in Human Tumors
Source: Research Square preprint supplement (doi:10.21203/rs.3.rs-4386631/v1), 2024-05-28
Supplement: Supplementary file 2 [file c633612c8138eeb55acf5897.xlsx]

## Sheet: Sheet1
Please download the original data from this website
https://figshare.com/s/15019faa343cd17ff4a1
